# Supplementary material for: Premature contractions of the bladder are suppressed by interactions between TRPV4 and SK3 channels in murine detrusor PDGFRα+ cells
Source: PubMed Central journal article supplement (PMC5613012; doi:10.1038/s41598-017-12561-7), 2017-09-25
Supplement: 41598_2017_12561_MOESM1_ESM.pdf [file 41598_2017_12561_MOESM1_ESM.pdf]

**Premature contractions of the bladder are suppressed by interactions between TRPV4 and SK3 channels in murine detrusor PDGFR $\alpha$ <sup>+</sup> cells**

Haeyeong Lee<sup>1\*</sup>, Byoung H. Koh<sup>1</sup>, Lauren E. Peri<sup>1</sup>, Robert D. Corrigan<sup>1</sup>, Hyun-Tai Lee<sup>1</sup>, Nikita E. George<sup>1</sup>, Bhupal P. Bhetwal<sup>1</sup>, Yeming Xie<sup>1</sup>, Brian A. Perrino<sup>1</sup>, Toby C. Chai<sup>2</sup>, Kenton M. Sanders<sup>1</sup>, Sang Don Koh<sup>1</sup>

**Supplementary Fig. S1: The effect of GSK on the detrusor smooth muscle cells.**

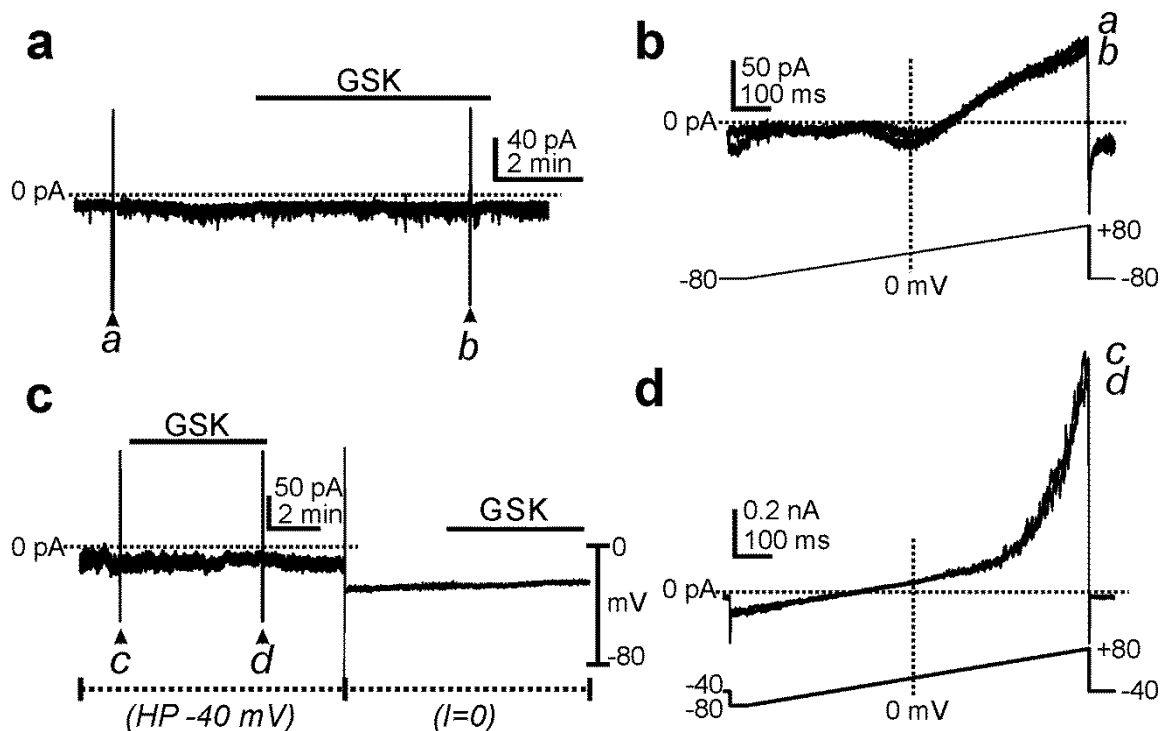

Cells were dialyzed with Cs<sup>+</sup>-rich (**a**, **b**) or K<sup>+</sup>-rich (**c**, **d**) solutions. GSK (100 nM) did not evoke any current in smooth muscle cells with a holding potential of -80 mV (**a**). Expanded time scales from panel **a** during ramp depolarization (see inset) before (**a**) and after (**b**) GSK. GSK did not activate the outward current at a holding potential of -40 mV and had no effect on the membrane potential under current-clamp mode ( $I=0$ , **c**). Expanded time scales from panel **c** during ramp depolarization before (**c**) and after (**d**) GSK (**d**).

**Supplementary Fig. S2: The property of TRPV4 channels in detrusor PDGFR $\alpha$ <sup>+</sup> cells.**

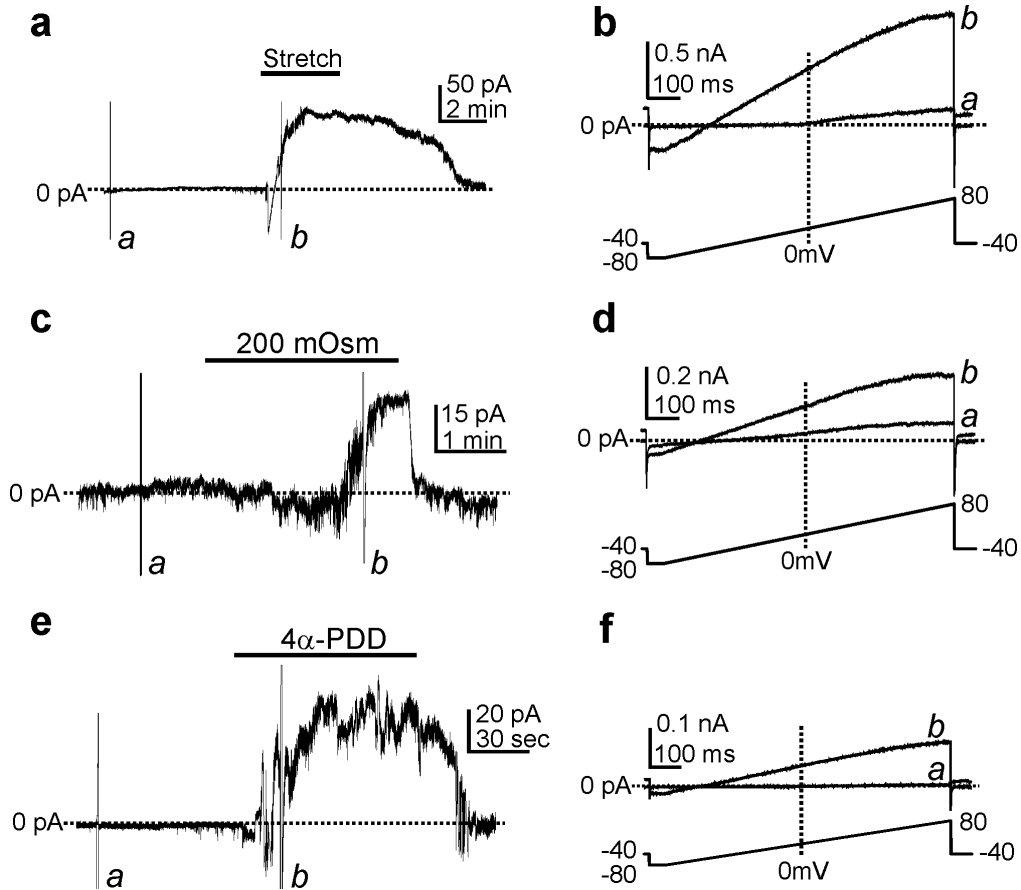

The effects of mechanical stretch, hypo-osmotic stress and 4 $\alpha$ -Phorbol 12,13-didecanoate (4 $\alpha$ -PDD) on generation of outward currents were tested in PDGFR $\alpha$ <sup>+</sup> cells dialyzed with K<sup>+</sup>-rich solutions at a holding potential of -40 mV. Cell elongation (1-2  $\mu$ m) induced initial inward current followed by the outward current at a holding potential of -40 mV (a). Expanded time scales (b) from panel a during ramp depolarization before (a) and after (b) cell elongation. Hypo-osmotic stress and 4 $\alpha$ -PDD exposure induced inward currents followed by outward currents (c & e, respectively). Expanded time scales (d & f) showed ramp depolarizations from panel c and e before (a), after (b) application of 200 mOsm solution and 4 $\alpha$ -PDD.

**Supplementary Table S1. Primer Source:**

| <b>Gene Name</b> | <b>Sequence (Sense primer on top)</b>                   | <b>Accession #</b> |
|------------------|---------------------------------------------------------|--------------------|
| <i>Gapdh</i>     | GCCGATGCCCCCATGTTTGTGA<br>GGGTGGCAGTGATGGCATGGAC        | NM_008084          |
| <i>Pdgfra</i>    | ATGACAGCAGGCAGGGCTTCAACG<br>CGGCACAGGTCACCACGATCGTTT    | NM_011058          |
| <i>Myh11</i>     | CAGCTGGAAGAGGCAGAGGAGG<br>AACAAATGAAGCCTCGTTTCCTCTC     | NM_013607          |
| <i>Kit</i>       | CGCCTGCCGAAATGTATGACG<br>GGTTCTCTGGGTTGGGGTTGC          | NM_021099          |
| <i>Uchl1</i>     | CGATGGAGATTAACCCCGAGATG<br>TTTTCATGCTGGGCCGTGAG         | NM_011670          |
| <i>Trpc1</i>     | CTGTGGATTATTGGGATGATTTGGTCA<br>CACTTTGAGGGCAAAGGTTGCCAA | NM_011643          |
| <i>Trpc2</i>     | CTCCTCCTGGCTGGGCTTG<br>GGTGAAGCTGAGCATGCTGGTG           | NM_011644          |
| <i>Trpc3</i>     | CAGCCAACACGATATCAGATAAT<br>AAGTTCATAACGAAGGCTGGAGATATC  | NM_019510          |
| <i>Trpc4</i>     | CCATGACTGGTGAATCTAAT<br>GGTGCCACATGTCCCATGATT           | NM_016984          |
| <i>Trpc5</i>     | CATCTCCCTGGTAGTGCTGCTG<br>CACCTTCATCAAAGTAACTCATCCAGAG  | NM_009428          |
| <i>Trpc6</i>     | GTGGTGCTTGCTGTTGTCATTG<br>CTTCAAATCTGTCAGCTGCATTCATGAC  | NM_013838          |
| <i>Trpc7</i>     | CTCATAATGAGAATCAAGATGTGCCTC<br>CAGAATTCCTCATGCCAGCCT    | NM_012035          |
| <i>Trpm1</i>     | CGTGGGTTGAAGTTGTTCCCTTAGC<br>TCGTTGATTCCTCCAATCTCATTGAC | NM_018752          |

|              |                                                         |              |
|--------------|---------------------------------------------------------|--------------|
| <i>Trpm2</i> | CTTCTGGAACAAACTGGACGTTGG<br>GAAGATGTGCATGAGACGGAGAC     | NM_138301    |
| <i>Trpm3</i> | GCTGACCAGATAGACCGTAAGC<br>GACAATCCATGCTCCTGTCTTGC       | NM_001035239 |
| <i>Trpm4</i> | GGAGCAGGTCCTCCTGGGACT<br>GGCACCCAGAAAGTCCGACG           | NM_175130    |
| <i>Trpm5</i> | CAACTGGAACAAGTGTGACATGGTG<br>GCAAAGATGTGGATGAGCCGAAGTG  | NM_020277    |
| <i>Trpm6</i> | CGGCTCATGGACTTCTTTGCTG<br>GGCTCAAAGACGATGTCACGAG        | NM_153417    |
| <i>Trpm7</i> | GTGCGTTTGCTAGACTTTCTAGCC<br>CAAGAGACCAAGATGGTTCTTCATGTG | NM_021450    |
| <i>Trpm8</i> | GCTGGGAGTCTGCCGACCTT<br>GGGTGCTGAAGTGGGTGGAGA           | NM_134252    |
| <i>Trpv1</i> | GAGAGCAAGAACATCTGGAAGCTGC<br>GATGATGCCACGTTGGTGTTCC     | NM_001001445 |
| <i>Trpv2</i> | GAGCTGGACTGGACTGCTAGAGTAC<br>TTCAGCACAGCCTTCATCAGGCAC   | NM_011706    |
| <i>Trpv3</i> | GAAGCGACTGAAGAAGCGCATCTTC<br>TAGGAGACCACGTTGATGTAGAAGG  | NM_145099    |
| <i>Trpv4</i> | GTGCTGGAGATCCTGGTGTACAAC<br>GTCAGCTTGTGCATGAGGAAGTCAG   | NM_022017    |
| <i>Trpv5</i> | AGACCAAGACTGGAACCAGCACG<br>TCCAGAGCTCCTCTTTGCCG         | NM_001007572 |
| <i>Trpv6</i> | GAGCCGAGACGAGCAGAACCT<br>CCCATGGCTCCTCTCTGGTGC          | NM_022413    |
